# Supplementary material
Source: Elsevier journal article supplement (https://www.sciencedirect.com/science/article/pii/S1138359320300538)
Supplement: mmc1 [file S1138359320300538:mmc1.docx]

## ANEXO 1:

## Cuestionario de Función Sexual de la Mujer: FSM-2*

1. SU INTERÉS O DESEO DE REALIZAR ALGÚN TIPO DE ACTIVIDAD SEXUAL HA SIDO:

- Muy bajo o nulo (1)
- Bajo (2)
- Normal (3)
- Alto o muy alto (4)

2. DURANTE LA ACTIVIDAD SEXUAL, CUANDO LE HAN (O SE HA) TOCADO O ACARICIADO ¿HA SENTIDO EXCITACIÓN SEXUAL? Por ejemplo, sensación de “ponerse en marcha”, deseo de “avanzar más” en la actividad sexual.

- Nunca o casi nunca (1)
- Algunas veces (hasta la mitad de las veces) (2)
- La mayoría de veces (más de la mitad de las veces) (3)
- Casi siempre - Siempre (4)
- No ha habido actividad sexual (0)

3. CUANDO SE SINTIÓ EXCITADA SEXUALMENTE ¿NOTÓ SUFICIENTE HUMEDAD Y/O LUBRICACIÓN VAGINAL?

- Nunca o casi nunca (1)
- Algunas veces (hasta la mitad de las veces) (2)
- La mayoría de veces (más de la mitad de las veces) (3)
- Casi siempre - Siempre (4)
- No ha habido actividad sexual (0)

4. DURANTE SU ACTIVIDAD SEXUAL, CUANDO LE HAN (O SE HA) TOCADO O ACARICIADO EN VAGINA Y/O ZONA GENITAL ¿HA SENTIDO DOLOR?

- Casi siempre-siempre (1)
- La mayoría de veces (más de la mitad de las veces) (2)
- Algunas veces (hasta la mitad de las veces) (3)
- Nunca o casi nunca (4)
- No ha habido actividad sexual (0)

5. DURANTE SU ACTIVIDAD SEXUAL, LA PENETRACIÓN VAGINAL (DEL PENE, DEDO, OBJETO...) ¿PODÍA REALIZARSE CON FACILIDAD?

- Casi siempre-siempre (4)
- La mayoría de veces (más de la mitad de las veces) (3)
- Algunas veces (hasta la mitad de las veces) (2)
- Nunca o casi nunca (1). Si eligió está opción señale las causas (una o más):

1. Sentir dolor
2. Miedo a la penetración
3. Falta de interés para la penetración
4. Incapacidad para la penetración por parte de la pareja
5. Otras causas (indicar)______________________________

- No ha habido actividad sexual (0)

6. ¿HA NOTADO RETRASO O DIFICULTAD PARA ALCANZAR EL ORGASMO, CUANDO MANTUVO ACTIVIDAD SEXUAL, CON O SIN PENETRACIÓN?

- Casi siempre-siempre (1)
- La mayoría de veces (más de la mitad de las veces) (2)
- Algunas veces (hasta la mitad de las veces) (3)
- Nunca o casi nunca (4)
- No ha habido actividad sexual (0)

7. ¿HA SENTIDO INQUIETUD O MIEDO ANTE LA IDEA O POSIBILIDAD DE TENER ACTIVIDAD SEXUAL?

- Mucha (1)
- Bastante (2)
- Algo (3)
- Nada (4)

8. ¿CUANTAS VECES HA SIDO USTED QUIEN HA DADO LOS PASOS INICIALES PARA PROVOCAR UN ENCUENTRO SEXUAL?

- Nunca o casi nunca (1)
- Algunas veces (hasta la mitad de las veces) (2)
- La mayoría de veces (más de la mitad de las veces) (3)
- Casi siempre - Siempre (4)

9. ¿SE HA SENTIDO CONFIADA PARA COMUNICAR A SU PAREJA LO QUE LE GUSTA O DESAGRADA EN SUS ENCUENTROS SEXUALES?

- Nunca o casi nunca (1)
- Algunas veces (hasta la mitad de las veces) (2)
- La mayoría de veces (más de la mitad de las veces) (3)
- Casi siempre – Siempre (4)

10. ¿CUANTAS VECES HA TENIDO ACTIVIDAD SEXUAL EN ESTAS 4 SEMANAS?

- 1-4 veces (1)
- De 5 a 8 veces (2)
- De 9 a 12 veces (3)
- Más de 12 veces (4)
- No ha habido actividad sexual (0). Si eligió esta respuesta indique el motivo (una o más respuestas):

1. Falta de deseo o interés
2. Inseguridad o miedo a no responder sexualmente de manera adecuada
3. Dolor o molestias durante la actividad sexual
4. Problemas sexuales de la pareja
5. Otros motivos (describir): _______________________________

11. DURANTE ESTAS 4 SEMANAS SU NIVEL DE SATISFACCIÓN SEXUAL HA SIDO

- Muy bajo o nulo (1)
- Bajo (2)
- Normal (3)
- Alto o muy alto (4)

12. ¿LE HA SUCEDIDO ALGÚN ACONTECIMIENTO EN LAS ÚLTIMAS 4 SEMANAS QUE HAYA PODIDO INFLUIR EN SU VIDA SEXUAL?:

SI NO Si ha respondido SÍ, por favor descríbalo brevemente: _______________________________________________________________

¿Cuánto cree que ha influido dicho acontecimiento en su vida sexual?:

Mucho Algo Nada

*Interesados en conocer instrucciones de uso y puntos de corte, por favor entrar en [www.cuestionariosdesalud.com](http://www.cuestionariosdesalud.com) o contactar con Dr. Froilán Sánchez Sánchez. Sexología Médica. Centro de Salud de Xàtiva. Av de Ausiàs March s/n. 46800-Xàtiva. Valencia. España
