# Supplementary material
Source: Elsevier journal article supplement (https://www.sciencedirect.com/science/article/pii/S1138359320300538)
Supplement: mmc2 [file S1138359320300538:mmc2.docx]

**Anexo 2: Dominios e ítems del Cuestionario de Función Sexual de la Mujer FSM-2.**

| Dominios evaluadores de la respuesta sexual (DERS) | **Ítems** |  |
| --- | --- | --- |
| 1-Deseo | 1 | Detectan el tipo de disfunción sexual, y la posible presencia de ella en la pareja. |
| 2-Excitación | 2 |
| 3-Lubricación | 3 |
| 4-Dolor genital | 4 |
| 5-Penetración vaginal | 5 |
| 6-Orgasmo | 6 |
| 7-Frecuencia de actividad sexual. | 10 |
| 8-Satisfacción sexual | 11 |
| Dominios descriptivos de la actividad sexual (DDAS) |  |  |
| 1-Ansiedad anticipatoria | 7 | Describen aspectos de especial interés en la actividad sexual |
| 2-Iniciativa sexual | 8 |
| 3-Confianza para comunicar preferencias sexuales a la pareja | 9 |
| 12-Acontecimientos recientes con influencia sobre la actividad sexual | 12 |
